1        **Differential cell fates of muscle stem cells are accompanied by symmetric**  
2                                **segregation of canonical H3 histones *in vivo***

3  
4        Brendan Evano<sup>1,2,3</sup>, Gilles Le Carrou<sup>1,2</sup>, Geneviève Almouzni<sup>3</sup> and Shahragim Tajbakhsh<sup>1,2,\*</sup>

5  
6        <sup>1</sup>Stem Cells & Development, Department of Developmental & Stem Cell Biology, Institut  
7        Pasteur, 25 rue du Dr. Roux, 75015, Paris, France.

8        <sup>2</sup>CNRS UMR 3738, Institut Pasteur, Paris 75015, France.

9        <sup>3</sup>CNRS UMR 3664, Nuclear Dynamics, Institut Curie, Pavillon Pasteur, 26 rue d'Ulm 75005  
10        Paris, France.

11        \*Correspondence: [shahragim.tajbakhsh@pasteur.fr](mailto:shahragim.tajbakhsh@pasteur.fr)

12     **Abstract**

13     Stem cells are maintained through symmetric or asymmetric cell divisions. While various  
14     mechanisms initiate asymmetric cell fates during mitosis, possible epigenetic control of this  
15     process has emerged recently. The asymmetrical distribution of a canonical histone H3  
16     variant during mitosis in fly germline has suggested a role for partitioning old and new  
17     nucleosomes in asymmetric cell fates. Here, we provide resources for single cell assays and  
18     show the asymmetric segregation of transcription factors along with old and new DNA in  
19     mouse muscle stem cells *ex vivo* and *in vivo*. However, these differential fate outcomes  
20     contrast with a symmetric distribution of the canonical H3.1 vertebrate variant. These  
21     findings point to different evolutionary mechanisms operating in fly germline stem cells and  
22     vertebrate somatic stem cells to mitigate epigenetic regulation of asymmetric cell fates.

23 A long-standing question in multicellular organisms is how epigenetic information is  
24 transmitted or changed through cell division. The nucleosome is the basic unit of chromatin  
25 and notably contributes to gene expression regulation through its composition (histone  
26 variants and modifications). It is therefore particularly critical to determine how, and where in  
27 the genome, the choice of histone variants, their turnover and post-translational modifications  
28 contribute to the maintenance or switch of a particular cell fate.

29 Histone dynamics has been addressed with a variety of approaches, on bulk chromatin  
30 or at specific loci. Stable isotope labeling followed by mass spectrometry analysis notably  
31 revealed differences in turnover rates of the histone H3 variants H3.1 and H3.3<sup>1</sup>. Fluorescent  
32 tags were used to assess global incorporation or inheritance patterns of H3 variants in *D.*  
33 *melanogaster*<sup>2,3</sup>. Additionally, photo-bleaching, photo-activation and photo-conversion have  
34 been used to measure histone dynamics on short timescales<sup>4</sup>. Complementary approaches  
35 were developed to measure locus-specific histone dynamics, by sequential expression of  
36 tagged histones followed by chromatin immunoprecipitation and DNA sequencing<sup>5,6</sup>, which  
37 have poor temporal resolution, or by metabolic labeling of histone proteins, which has a better  
38 resolution but does not distinguish between different histone variants<sup>7</sup>. Although these  
39 methods provided significant insights into chromatin dynamics, they suffer from specific  
40 downsides, from lack of positional information to delays in expression of inducible reporters.  
41 In addition, current knowledge about histone dynamics arises predominantly from *in vitro*  
42 models where cell fate cannot be manipulated.

43 Histone H3 variants have a major role in epigenetic maintenance during development  
44 and disease<sup>8,9</sup>, but tools to measure histone dynamics *in vivo* either globally or at specific loci  
45 are lacking. Here, we sought to investigate histone H3 variants dynamics *in vivo* in mouse,  
46 using SNAP tags as reporters and skeletal muscle stem cells as a model of changes in cell  
47 fates. SNAP tags react specifically and irreversibly with benzylguanine derivatives<sup>10</sup>. A

48 number of cell-permeable SNAP substrates are available (fluorescent, biotinylated or  
49 amenable to custom-probe synthesis through benzylguanine building blocks), with low  
50 toxicity and allowing fast and quantitative labeling<sup>11</sup>. SNAP tags were reported to work  
51 efficiently and specifically *in vivo* in mice<sup>12</sup>, and proved to be superior to classical fluorescent  
52 proteins in terms of spectral flexibility, signal-to-noise fluorescence and resistance to  
53 histological sample preparations<sup>12,13</sup>. Further, SNAP tags allow the development of  
54 functionalities *via* synthetic substrates that cannot be achieved with classical genetically  
55 encoded reporters<sup>14</sup>. Finally, SNAP tags have been used extensively to measure histone H3  
56 variants dynamics on bulk chromatin<sup>15-18</sup>, and were adapted recently to measure specific  
57 histone variants turnover genome-wide<sup>19</sup>.

58 In most tissues, stem cells self-renew and give rise to daughter cells committed to  
59 differentiation, thereby ensuring both tissue homeostasis and maintenance of the stem cell  
60 pool<sup>20</sup>. This can be achieved through different modes of cell division, either symmetric  
61 (Symmetric Cell Division, SCD), self-renewing or differentiating, or asymmetric  
62 (Asymmetric Cell Division, ACD) divisions. Fine-tuning the balance between these different  
63 modes is critical for proper tissue development, homeostasis and regeneration, and to prevent  
64 tumorigenesis<sup>20</sup>.

65 A variety of subcellular constituents, including transcripts, organelles, centrosomes or  
66 sister chromatids can distribute asymmetrically between daughter cells during cell division<sup>21</sup>.  
67 A major challenge is to understand how their biased segregation dictates asymmetric cell  
68 fates<sup>22</sup>. The hypothesis of a role for replication-coupled nucleosome assembly in determining  
69 asymmetric cell fates in *C. elegans* nervous system has raised much interest<sup>23</sup>. Furthermore,  
70 recent studies reported non-equivalent inheritance of specific histone variants during ACD of  
71 *D. melanogaster* male germline stem cells (GSCs)<sup>3,24</sup>. These findings along with the  
72 importance of chromatin in cell plasticity<sup>9</sup> raised the possibility of an epigenetic mechanism

73 for maintaining the identity of self-renewed stem cells while resetting the identity of their  
74 differentiating sibling cells.

75 Here we sought to investigate whether the non-equivalent inheritance of specific  
76 histone variants is conserved in mammals, using mouse skeletal muscle stem cells as a model.  
77 Adult skeletal muscle satellite (stem) cells are mostly quiescent during homeostasis.  
78 Following muscle damage, they proliferate and differentiate into muscle fibres by cell-cell  
79 fusion<sup>25,26</sup>. A fraction of the population self-renews and reconstitutes a *de novo* satellite cell  
80 pool. This is accompanied by a temporal expression of cell fate markers, such as the  
81 transcription factors Pax7 (stem), Myod (commitment) and Myogenin (differentiation).  
82 Satellite cells can divide symmetrically and asymmetrically during muscle regeneration<sup>27-29</sup>,  
83 which is critical for proper muscle regeneration and maintenance of the satellite cell  
84 pool<sup>27,30,31</sup>.

## 86 **Results**

87 To address whether the mechanism uncovered in *Drosophila* GSCs operates in a  
88 somatic mammalian stem cell, we developed a pulse-chase approach to follow histone  
89 variants using SNAP tags. SNAP-tagged histones have been used for addressing human H3.1  
90 and H3.3 turnover during DNA replication and repair<sup>16-18</sup>. The asymmetric inheritance of H3,  
91 but not H3.3, reported in *D. melanogaster* GSCs<sup>3</sup> prompted us to generate mouse reporter  
92 lines expressing SNAP-tagged H3.1 and H3.3 to follow their inheritance patterns during ACD  
93 of satellite cells.

94 *H3.1-SNAP* and *H3.3-SNAP* transgenes were expressed in several tissues  
95 (Supplementary Fig. 1a), at low levels (< 20%) compared to endogenous histone expression  
96 (Supplementary Fig. 1b). SNAP labeling of embryonic fibroblasts derived from reporter mice  
97 showed ubiquitous *H3.1-SNAP* expression, whereas *H3.3-SNAP* expression was lower and

98 variegated (data not shown). Furthermore, as reported<sup>16</sup> we find that newly deposited H3.1-  
99 SNAP histones overlapped with sites of DNA replication, while newly deposited H3.3-SNAP  
100 histones were uncoupled from DNA replication (Supplementary Fig. 1c). These results  
101 indicate that the *Tg:H3.1-SNAP* and *Tg:H3.3-SNAP* lines are faithful reporters of H3.1 and  
102 H3.3 turnover in mouse primary cells.

103 To examine the distribution of parental H3.1 histones in satellite cells, adult *Tibialis*  
104 *anterior* (TA) muscles were injured to induce satellite cell activation and muscle regeneration.  
105 Parental H3.1 histones were SNAP-labeled prior to satellite cell isolation (labeling efficiency  
106  $\approx 80\%$ , Fig. 1a and Supplementary Fig. 1d). Satellite cells were isolated from compound  
107 transgenic *Tg:Pax7-nGFP*<sup>32</sup> and *Tg:H3.1-SNAP* mice by fluorescence-activated cell sorting  
108 (FACS) where GFP intensity can be used to fractionate subpopulations with distinct  
109 properties, such as Pax7-nGFP<sup>Hi</sup> cells previously reported to divide asymmetrically 5 days  
110 post-injury (dpi)<sup>28</sup>. *In vivo* activated/SNAP-labeled Pax7-nGFP<sup>Hi</sup> cells were isolated by FACS  
111 and the ongoing cell division was monitored on micropatterns (Fig. 1a). Micropatterns  
112 provide a controlled microenvironment that allows confinement of single cells and their  
113 progeny<sup>33</sup>. We and others have shown that their geometry impacts on the frequency of ACD  
114 of stem cells<sup>29,34</sup>. If the parental histones are partitioned equally following mitosis, the  
115 fluorescent SNAP signal will be inherited equally between daughter cells. However, if the  
116 parental histones are inherited asymmetrically, the fluorescent SNAP signal will be detected  
117 only in a subset of daughter cells (Fig. 1b).

118 Modes of cell division were scored based on absolute presence or absence of cell fate  
119 markers. Their expression level and SNAP signal intensity were further measured  
120 quantitatively. We observed self-renewing and differentiating (Fig. 1c left and middle) SCDs,  
121 in addition to ACDs (Fig. 1c right), as reported<sup>28,29</sup>. Interestingly, we observed clones  
122 containing 4 cells with two self-renewed cells (Pax7<sup>+</sup>) and two differentiated cells (Myog<sup>+</sup>),

123 indicating a switch from self-renewing SCD to ACD (Supplementary Fig. 1e). Among all  
124 observed clones, the SNAP signal intensity was equivalent between daughter cells,  
125 irrespective of their mode of cell division (Fig. 1c). The maximal SNAP intensity difference  
126 between daughter cells was less than 8% (Fig. 1c left), while transcription factors displayed  
127 differences in expression up to 80% between daughter cells in case of ACD (Fig. 1c right).  
128 These results indicate that parental H3.1 histones were essentially inherited symmetrically  
129 during both SCD and ACD of satellite cells.

130 H3-Thr3 phosphorylation (H3T3<sup>P</sup>) was reported to distinguish pre-existing and newly-  
131 deposited H3 in prophase, and to be required for asymmetric inheritance of old *vs.* new  
132 histones in *D. melanogaster* GSCs<sup>24</sup>. To further address the issue of histone inheritance, we  
133 investigated the distribution of H3T3<sup>P</sup> in *in vivo* activated/SNAP-labeled Pax7-nGFP<sup>Hi</sup> cells  
134 on micropatterns. We readily detected H3T3<sup>P</sup> signals in mitotic cells, colocalizing with SNAP  
135 signals yet not restricted to a subset of chromatids in early mitosis (Fig. 1d). These  
136 observations indicate that H3T3<sup>P</sup> did not point to a differential distribution of old *vs.* new  
137 histones in early mitosis of satellite cells.

138 Within adult muscles, satellite cells reside in a specific niche and a complex balance  
139 between extrinsic and intrinsic cues is required for proper satellite cell proliferation and cell  
140 fate determination<sup>35</sup>. As with other stem cell niches<sup>36</sup>, the composition of the satellite cell  
141 microenvironment is dynamic during muscle regeneration<sup>37</sup>, raising the possibility that some  
142 niche factors that cannot be modelled *ex vivo* might drive ACDs. Although ACDs have been  
143 reported extensively *ex vivo*, to the best of our knowledge, only one study has demonstrated  
144 asymmetry involving transcription factors in a vertebrate model system *in vivo*<sup>38</sup>.

145 Therefore, we established a clonal tracing strategy to examine two-cell clones in  
146 regenerating muscles *in vivo* (Fig. 2a and Fig. 2b), together with SNAP-labeling of parental  
147 H3.1 histones (*in vivo* labeling efficiency  $\approx$  60%, Supplementary Fig. 2b). As previously,

148 modes of cell division were scored based on absolute presence or absence of cell fate markers.  
149 Their expression level and SNAP signal intensity were further measured quantitatively. We  
150 observed self-renewing (66.7%, n=98 of 147 cell pairs, Fig. 2c and Fig. 2d left) and  
151 differentiating (6.8%, n=10 of 147 cell pairs, Fig. 2c and Fig. 2d middle-left) SCDs, in  
152 addition to ACDs (23.1%, n=34 of 147 cell pairs, Fig. 2c and Fig. 2d middle-right and right).  
153 Notably, the relative frequencies of the different modes of cell division observed *in vivo*  
154 correspond to those on micropatterns *ex vivo*<sup>29</sup>. Among all clones analysed, we observed an  
155 equivalent SNAP signal between daughter cells (Fig. 2d). Interestingly, a difference in SNAP  
156 signal intensity (up to 40%) between daughter cells was noted for a limited number ( $\approx 5\%$ ) of  
157 divisions (Fig. 2d left and right, Fig. 2g right). However, the differences in SNAP intensity  
158 were lower than the observed differences in expression of cell fate markers, resulting from  
159 fluctuations in expression in case of SCD (Fig. 2d left) or asymmetric fate decisions (Fig. 2d  
160 right). Further, we did not detect examples showing exclusive distribution of parental histones  
161 to one daughter. These results point to a symmetric inheritance of parental H3.1 histones,  
162 irrespective of the mode of cell division *in vivo*.

163 Notably, differences in SNAP signals between daughter cells were not observed *ex*  
164 *vivo* on micropatterns (Fig. 1c), suggesting variable H3.1 turnover rates between daughter  
165 cells *in vivo* and *ex vivo*. These observations highlight the importance of addressing epigenetic  
166 identity and plasticity *in vivo*. Finally, the SNAP signal was readily detected after histological  
167 preparation (strong fixation and heat-induced epitope retrieval), while the mGFP fluorescence  
168 was lost and required immunodetection, confirming the superiority of synthetic SNAP  
169 fluorophores over classical fluorescent proteins.

170 The asymmetric segregation of stem (Pax7) and differentiation (Myogenin)  
171 transcription factors was previously reported to correlate in part with non-random DNA  
172 segregation (NRDS) *ex vivo*, where old DNA strands are inherited by the stem cell and new



173 DNA strands by the committed cell<sup>28,29</sup>. NRDS has been hypothesized to be a consequence of  
174 epigenetic mechanisms, possibly involving distribution of old and new histones or  
175 nucleosome pools<sup>22</sup>; however NRDS has not been shown robustly *in vivo* largely due to  
176 technical challenges. To examine parental H3.1 histone distribution and NRDS *in vivo*, we  
177 adopted the same strategy as above, together with a 5-ethynyl-2'-deoxyuridine (EdU) pulse-  
178 chase labeling (Fig. 2a and Fig. 2e) to identify both old DNA strands (EdU pulse) and new  
179 DNA strands (EdU chase).

180 We observed clonal examples of random DNA segregation (23.1%, n=12 of 52 cell  
181 pairs, Fig. 2f and Fig. 2g left) and non-random DNA segregation (76.9%, n=40 of 52 cell  
182 pairs, Fig. 2f and Fig. 2g middle and right). Interestingly, 22.5% of the cell pairs with NRDS  
183 showed asymmetric Myogenin expression (n=9 of 40 NRDS cell pairs, Fig. 2f and Fig. 2g  
184 right), with Myogenin being expressed in the EdU-negative daughter cell, as reported  
185 previously *ex vivo* where parental DNA strands are labeled and inherited by the Pax7-  
186 expressing cell<sup>28,29</sup>. Among all the clones analysed, the SNAP signal was equivalent between  
187 daughter cells (Fig. 2g), indicating a symmetric parental H3.1 inheritance, independent of the  
188 mode of DNA segregation.

189

## 190 **Discussion**

191 Here we demonstrate that SNAP tags are powerful tools to investigate histone  
192 dynamics in mice *in vivo*. Our results indicate that parental H3.1 histones are equally inherited  
193 in the vast majority of dividing mouse satellite cells, *ex vivo* as *in vivo*, during asymmetric  
194 cell fate decisions with defined stem cell and differentiated cell transcription factors, as well  
195 as non-random segregation of DNA. Asymmetric histone H3 inheritance has uniquely been  
196 reported in *D. melanogaster* GSCs to date and was correlated with the execution of different  
197 cell fate programs following cell division<sup>3,24</sup>. A two-step mechanism was proposed where old

198 and new histones are incorporated into different sister chromatids during S phase, followed by  
199 differential recognition and segregation of old and new sister chromatids by the mitotic  
200 apparatus<sup>3,24</sup>. This requires both an asymmetric distribution of histones at the replication fork,  
201 and strictly unidirectional DNA replication throughout the genome. Recently, two reports  
202 highlighted that while histone partitioning in the wake of the replication fork is inherently  
203 asymmetric between leading and lagging DNA strands, components of the replication  
204 machinery compensate to ensure an equal distribution of parental histones between sister  
205 chromatids<sup>39,40</sup>. Asymmetric histone distribution in *Drosophila* GSCs might then result from  
206 retention of parental histones on the leading strand and preferential unidirectional DNA  
207 replication<sup>41</sup>. While our results address global inheritance of parental histones and cannot  
208 exclude local limited asymmetry, notably at the replication fork, the discrepancy observed  
209 between *D. melanogaster* GSCs and our analysis of mouse satellite cells might indicate that  
210 the molecular mechanisms of asymmetric histone inheritance are not generally conserved  
211 through evolution, or alternatively between germline and somatic stem cells.

212 Our results show unambiguously for the first time NRDS *in vivo* and indicate that this  
213 process is not driven by a global asymmetric inheritance of old and new pools of H3.1.  
214 Nevertheless, according to the silent sister hypothesis<sup>42</sup>, epigenetic differences might exist  
215 between sister chromatids due to their relative difference in age. Asymmetric recognition of  
216 centromeres would then be the basis for NRDS, which would in turn lead to asymmetric gene  
217 expression and cell fate decisions. In this context, it is interesting to note that CENP-A, the  
218 centromeric H3 variant, was shown to be inherited asymmetrically during stem cell divisions  
219 in the fly midguts<sup>43</sup>, a possibility to explore in the future.

220 Finally, while our study investigated inheritance of bulk histones, the tools and  
221 methodologies reported here, combined with the recent advent of time-ChIP<sup>19,44</sup>, will allow  
222 genome-wide tracking of histone variant turnover rates. This can be done in a wide variety of

223 mouse primary cell types in their *in vivo* environment thereby facilitating investigations of  
224 how epigenetic identity is maintained in stem cells, and remodeled in their differentiating  
225 progeny.

226

## 227 **Methods**

### 228 Mouse strains

229 *Tg:Pax7-nGFP*<sup>32</sup>, *Pax7<sup>CreERT2</sup>*<sup>45</sup> and *R26<sup>mTmG</sup>*<sup>46</sup> were described previously. Breeding  
230 was performed on an F1:C57BL6/DBA2 background. 6-8 weeks-old male littermates were  
231 used in this study, heterozygous for each allele used. Animals were handled according to  
232 national and European community guidelines, and protocols were approved by the ethics  
233 committee at Institut Pasteur.

234

### 235 Cell lines and culture conditions

236 Primary fibroblasts were derived at E13.5 and cultured in DMEM GlutaMAX  
237 (ThermoFisher) 10% Fetal Bovine Serum (FBS) 1% Penicillin-Streptomycin (PS,  
238 ThermoFischer) at 37°C 5% CO<sub>2</sub> 3% O<sub>2</sub>.

239 Satellite cells were plated on glass coverslips coated with Matrigel (Corning) for 30 min  
240 at 37°C or on micropatterns in satellite cell medium (40% DMEM 40% MCDB (Sigma) 20%  
241 FBS 2% Ultrosor (Pall) 1% PS).

242

### 243 Establishment of H3.1/H3.3-SNAP mouse strains

244 Mouse H3.1 (resp. H3.3) coding sequence was PCR amplified (Phusion Taq polymerase,  
245 New England Biolabs) from mouse primary fibroblasts cDNA (SuperScript III Reverse  
246 Transcriptase, ThermoFisher) with NotI\_mH3.1\_F (resp. NotI\_mH3.3\_F) and  
247 DPPVAT\_mH3.1\_R (resp. DPPVAT\_mH3.3\_R) primers, PCR-fused to a SNAP tag  
248 amplified from pSNAPm (New England Biolabs) with DPPVAT\_SNAP\_F and  
249 BamHI\_SNAP\_R primers, and cloned in pGEM-T easy (Promega) with T4 DNA ligase (New  
250 England Biolabs). A DPPVAT linker was included between histone coding sequences and the  
251 SNAP tag as in <sup>16,17</sup>. H3.1-SNAP (resp. H3.3-SNAP) EcoRI/BamHI (New England Biolabs)  
252 fragment was subcloned in a pCAG SV40 Puro plasmid between the EcoRI and BamHI sites  
253 downstream the CAG promoter and upstream an SV40 early polyA termination sequence.

254 CAGG H3.1/H3.3-SNAP polyA SpeI/KpnI (New England Biolabs) DNA fragments were  
255 microinjected in fertilized oocytes to derive transgenic lines.

256 Genotyping was performed by PCR from ear punch biopsies with CAG\_For and  
257 DPPVAT\_mH3.1\_R or DPPVAT\_mH3.R\_R primers. *H3.1-SNAP* transgene insertion was  
258 mapped to chromosome 7 by inverse PCR (gDNA digestion with SacI (New England  
259 Biolabs), intramolecular ligation with T4 DNA ligase, PCR amplification with SV40  
260 PolyA\_F and SNAP qPCR\_R primers). *H3.3-SNAP* transgene insertion was mapped to  
261 chromosome 10 by inverse PCR (gDNA digestion with BamHI, intramolecular ligation with  
262 T4 DNA ligase, PCR amplification with SNAP qPCR\_F and CAG\_R3 primers). Primers used  
263 are listed in Supplementary Table 1.

264

### 265 RT-qPCR

266 Organs were homogenized in TRIzol (ThermoFisher) and RNA extracted following  
267 manufacturer's instructions. gDNA was eliminated with Ambion DNaseI (ThermoFisher)  
268 and reverse transcription performed with SuperScript III Reverse Transcriptase  
269 (ThermoFisher). RNA was eliminated with RNaseH endonuclease (Roche) for 20 min at  
270 37°C. mRNAs level was assessed with SYBR green master mix (Roche) and analysis was  
271 performed using the  $2^{-\Delta Ct}$  method<sup>47</sup>. RT-qPCR analyses have been normalized with *Tbp*.  
272 Specific forward and reverse primers used for RT-qPCR are listed in Supplementary Table 1.

273

### 274 Western blot

275 Histones were extracted following<sup>48</sup> and protein concentration measured with the Pierce  
276 BCA Protein Assay Kit (ThermoFisher). 1  $\mu$ g of histones was run on 4-12% Bis-Tris Gel  
277 NuPAGE (ThermoFisher) in NuPAGE MES SDS Running Buffer (ThermoFisher) and  
278 transferred on a nitrocellulose membrane (Hybond ECL, Sigma) in 1X Tris-Glycine-SDS  
279 buffer (Euromedex) with 20% ethanol. Equivalent loading was evaluated from Ponceau  
280 staining of the membrane. The membrane was then blocked with 5% non-fat milk in Tris  
281 Buffer Saline (TBS) Tween 0.05% (TBS-T) for 20 min at RT and probed with specific  
282 primary antibodies overnight at 4°C in TBS-T 5% milk. After three washes in TBS-T, the  
283 membrane was incubated with HRP-conjugated secondary antibodies in TBS-T for 30 min at  
284 RT, washed three times in TBS-T, and revealed by chemiluminescence (Pierce ECL Plus  
285 Western Blotting Substrate, ThermoFisher) with autoradiography films (Hyperfilm ECL, GE  
286 Healthcare).

287

288 SNAP labeling

289 *In vitro* SNAP quenching (Supplementary Fig. 1c) was performed with 10  $\mu$ M SNAP  
290 Cell Block (New England Biolabs) for 30 min at 37°C, followed by three washes with culture  
291 medium. *In vitro* SNAP labeling was performed with 3  $\mu$ M SNAP Cell TMR Star (New  
292 England Biolabs) in culture medium for 20 min at 37°C, followed by three washes with  
293 culture medium, and washed in culture medium for 30 min at 37°C. Sites of DNA replication  
294 were labeled with 1  $\mu$ M EdU (ThermoFisher) for 10 min at 37°C. Soluble histones were  
295 extracted with CSK buffer prior to fixation as in <sup>16</sup>. EdU incorporation was detected with the  
296 Click-iT Plus Alexa Fluor 488 Imaging Kit (ThermoFisher) as recommended.

297 *Ex vivo* SNAP labeling (Fig. 1a) was performed by incubating dissected and minced TA  
298 muscles in 1 ml satellite cell medium containing 3  $\mu$ M SNAP Cell SiR 647 (New England  
299 Biolabs, S9102S) for 30 min at 37°C with gentle agitation. Muscles were centrifuged at 500g  
300 for 5 min, supernatant was discarded and muscles resuspended in 1 ml DMEM. Muscles were  
301 centrifuged at 500g for 5 min, supernatant was discarded and muscles resuspended in  
302 collagenase D/trypsin mix for satellite cell isolation (see below).

303 *In vivo* SNAP labeling was performed by injecting 10  $\mu$ l of 30  $\mu$ M SNAP Cell SiR 647  
304 (New England Biolabs) in NaCl 0.9% per TA at 4 dpi under isofluorane anesthesia, 8 h before  
305 tamoxifen administration (Fig. 2a). *In vivo* H3.1-SNAP labeling at 4 dpi enables specific  
306 labeling of  $\approx$  60% of satellite cells as early as 2 h post SNAP substrate injection  
307 (Supplementary Fig. 2b).

308

309 Muscle injury, tamoxifen and EdU delivery

310 Muscle injury was done as described previously <sup>49</sup>. Briefly, mice were anesthetized with  
311 0.5% Imalgene/2% Rompun. The *Tibialis anterior* (TA) muscle was injected with 15  $\mu$ l of 10  
312  $\mu$ M notexin (Latoxan) in NaCl 0.9%.

313 Tamoxifen (Sigma) was reconstituted at 25 mg/ml in corn oil/ethanol (5%) and stored at  
314 -20°C. Before use, tamoxifen was diluted at appropriate concentration (1 mg/ml or 0.25  
315 mg/ml) with corn oil, and administered (8  $\mu$ l per g of mouse) by intragastric injection at 4  
316 days post-injury and 14 h prior to sacrifice to allow for a maximum of two consecutive cell  
317 divisions *in vivo* (*in vivo* satellite cells doubling time about 8 h <sup>28</sup>). We optimized conditions  
318 for clonal tracing leading to two-cell clones shortly after (14 h) tamoxifen administration.  
319 Clones were defined when mGFP-labeled cells were in close proximity (< 150  $\mu$ m apart,  
320 Supplementary Fig. 2a and Supplementary Fig. 2c) and isolated from any other mGFP-  
321 labeled cell. In addition, the definition of criteria for clonality was based on an extremely low

322 dose of tamoxifen (2  $\mu\text{g/g}$  of mouse, recombination frequency < 0.5%). We then used a  
323 tamoxifen dose (8  $\mu\text{g/g}$  of mouse) inducing a recombination frequency about 10% to increase  
324 the representation of the myogenic population. For each mouse, one TA muscle was used for  
325 immunohistochemistry analysis, and the contralateral TA was used for determining the  
326 recombination efficiency following dissociation and immunostaining.

327 EdU (ThermoFisher) was dissolved in NaCl 0.9% and injected intraperitoneally (0.3  
328  $\mu\text{g/g}$  of mouse) 9 and 7 h before tamoxifen administration.

329

### 330 Satellite cells isolation and live-imaging

331 Dissections were done essentially as described previously<sup>49</sup>. Injured TA muscles were  
332 removed from the bone in cold DMEM, minced with scissors, and then digested with a  
333 mixture of 0.08% Collagenase D (Sigma), 0.1% Trypsin (ThermoFisher), 10  $\mu\text{g/ml}$  DNase I  
334 (Sigma) in DMEM for five consecutive cycles of 30 min at 37°C. For each round, the  
335 supernatant was filtered through a 70  $\mu\text{m}$  cell strainer (Miltenyi) and collagenase and trypsin  
336 were blocked with 8% FBS on ice. Pooled supernatants from each digestion cycle were  
337 centrifuged at 500g for 15 min at 4°C. The pellet was resuspended in 2 ml cold PBS  
338 (ThermoFisher) and placed on top of cold Percoll layers (Sigma)(5 ml of 20% Percoll and 3  
339 ml of 60% Percoll). After centrifugation at 500g for 15 min at 4°C, cells were collected from  
340 the 20%-60% interphase, while dense debris were concentrated below the 60% layer. The  
341 collected fraction was diluted in 40 ml DMEM 8% FBS and centrifuged at 500g for 15 min at  
342 4°C. The pellet was resuspended in 500  $\mu\text{l}$  satellite cell medium and filtered through a 40  $\mu\text{m}$   
343 cell strainer (Falcon). Cells were plated on glass coverslips coated with Matrigel or sorted  
344 (Supplementary Fig. 3) using a FACS Aria III (BD Biosciences) and collected in cold 250  $\mu\text{l}$   
345 of satellite cell medium. Sorted cells were plated on micropatterns (see below) and incubated  
346 at 37°C, 5% CO<sub>2</sub>, and 3% O<sub>2</sub> in a Zeiss Observer.Z1 microscope connected to an LCI PlnN  
347 10x/0.8 W DICII objective and Hamamatsu Orca Flash 4 camera piloted with Zen (Zeiss).  
348 Cells were filmed and images were taken every 9 min with bright-field filter to ensure that  
349 single cells were plated on the micropatterns and that their progeny remained confined. The  
350 raw data were analysed with TrackMate<sup>50</sup>, transformed and presented as videos.

351

### 352 Micropatterns

353 Micropatterns were manufactured essentially as described<sup>29,51</sup>. Briefly, glass coverslips  
354 (24 x 60 mm #1, Thermo Scientific Menzel) were cleaned serially in  
355 H<sub>2</sub>O/acetone/isopropanol, activated with an oxygen plasma treatment (Harrick Plasma) for 5

356 min at 30W and incubated with poly-L-lysine polyethylene glycol (PLL(20)-g[3.5]-PEG(2),  
357 SuSoS) at 100  $\mu\text{g/ml}$  in 10 mM HEPES pH 7.4 at room temperature (RT) for 30 min, washed  
358 twice with  $\text{H}_2\text{O}$  and stored dried at 4°C. PLL-PEG-coated slides were placed in contact with  
359 an optical mask containing transparent micropatterns (Toppan Photomask) using  $\text{H}_2\text{O}$  (0.6  
360  $\mu\text{l/cm}^2$ ) to ensure tight contact between the mask and the coverslip and then exposed to deep  
361 UV light (Jelight). Micropatterned slides were subsequently incubated with 40  $\mu\text{g/ml}$   
362 fibronectin (Sigma) and 5  $\mu\text{g/ml}$  fibrinogen Alexa Fluor 488 (ThermoFisher) in 100 mM  
363  $\text{NaHCO}_3$  pH 8.3 for 25 min at RT and rinsed three times in  $\text{NaHCO}_3$ , three times in  $\text{H}_2\text{O}$  and  
364 dried and transferred immediately on a 12 kPa polyacrylamide (PAA) gel on silanized glass  
365 coverslips, to match the substrate rigidity of skeletal muscles<sup>52</sup>. 81  $\text{mm}^2$ -square glass  
366 coverslips were cut out larger coverslips (22 x 22 mm #1, Thermo Scientific Menzel), cleaned  
367 serially with  $\text{H}_2\text{O}/\text{EtOH}$  70%/EtOH 100%, deep-UV-activated, silanized with 7.1% (vol/vol)  
368 bind-silane (Sigma) and 7.1% (vol/vol) acetic acid in EtOH 99% for 10 min at RT, washed  
369 twice with EtOH 99% and dried. Transfer of micropatterns on PAA gel was performed with 7  
370  $\mu\text{l/cm}^2$  of a solution containing 7.5% acrylamide (Sigma), 0.16% bis-acrylamide (Sigma),  
371 0.05% TEMED (Sigma), 0.05% APS (Sigma, A3678) in HEPES 10 mM pH 7.4 for 45 min at  
372 RT. Gels were rehydrated in  $\text{NaHCO}_3$  100 mM pH 8.3 for 15 min at RT, detached from  
373 patterned coverslips and washed with PBS three times before cell seeding.

374 Micropatterned PAA gels were transferred in an in-house-made glass-bottom 6 well Petri  
375 dish to allow live-imaging and PAA embedding before immunostaining (see below). Briefly,  
376 32 mm diameter glass coverslips were cleaned and silanized, a 14 x 14 x 0.45 mm piece of  
377 silicone (Smooth-on) was put at the center, and coverslips were layered with a 12 kPa PAA  
378 gel ('surrounding' PAA). After PAA polymerization, the coverslips were sealed (silicone) to  
379 the bottom of a 6 well plate (TPP) drilled out to 30 mm diameter. The silicone at the center of  
380 the PAA gel was removed and replaced with a 16 x 16 x 3 mm silicone isolator with a 10 x 10  
381 x 3 mm window at the center to fit micropatterned PAA gels (9 x 9 mm) after filling with  
382 PBS. The apparatus was washed several times and equilibrated with satellite cell medium.  
383 Medium was removed completely and cells (250  $\mu\text{l}$ ) seeded within the silicone isolator on  
384 micropatterns and, 90 min after plating, nonattached cells were washed with medium and  
385 medium volume was adjusted to 5 ml.

386

### 387 Immunocytochemistry and Immunohistochemistry

388 Cells on micropatterns were fixed in 4% paraformaldehyde (PFA, Electron Microscopy  
389 Sciences) in PBS containing 0.9 mM  $\text{CaCl}_2$  and 0.5 mM  $\text{MgCl}_2$  (PBS  $\text{Ca}^{2+}$   $\text{Mg}^{2+}$ ) for 5 min at

390 RT and washed in PBS  $\text{Ca}^{2+}$   $\text{Mg}^{2+}$  for 5 min at RT. To prevent cell loss during subsequent  
391 immunostaining steps, cells were embedded in PAA. Cells were equilibrated in a solution  
392 containing 3.82% acrylamide, 0.13% bis-acrylamide and 0.1% TEMED in PBS for 30 min at  
393 RT, and the solution was replaced with 3.82% acrylamide, 0.13% bis-acrylamide, 0.1%  
394 TEMED and 0.05% APS in PBS. The silicone isolator was carefully detached and a parafilm-  
395 covered 20 x 20 mm glass coverslip (20 x 20 mm #1, Thermo Scientific Menzel) was adjusted  
396 on top of the micropatterns, sitting on the ‘surrounding’ PAA. Excess polymerization solution  
397 was removed and PAA allowed to polymerize for 1 h at RT. After rehydration in PBS for 15  
398 min, the parafilm-covered coverslip was detached, PAA-embedded micropatterns were  
399 recovered and washed several times in PBS. Cells were permeabilized in 0.5% Triton X-100  
400 (Sigma) for 20 min at RT, washed three times 10 min in PBS, blocked in 10% goat serum  
401 (GS, Gibco) for 4 h at RT, incubated with primary antibodies overnight at 4°C in 2% GS,  
402 washed four times 1 h in PBS at 4°C, incubated with Alexa Fluor-conjugated secondary  
403 antibodies and Hoechst when required overnight at 4°C in 2% GS and washed four times 1 h  
404 in PBS at 4°C. For Pax7/Myod/Myog triple staining, cells were further blocked with Pax7  
405 primary antibody overnight at 4°C in 2% GS, washed four times 1 h in PBS at 4°C, incubated  
406 with Alexa Fluor 488-conjugated anti-Myogenin and DyLight 405-conjugated anti-Myod  
407 antibodies (see below) in 2% GS overnight at 4°C and washed four times 1 h in PBS at 4°C.

408 Cells on glass coverslips were fixed in 4% PFA for 5 min at RT, washed twice in PBS,  
409 permeabilized in 0.5% Triton X-100 for 5 min, blocked in 10% GS for 30 min at RT,  
410 incubated with primary antibodies in 2% GS for 2 h at RT, washed in PBS three times 5 min,  
411 incubated with Alexa Fluor-conjugated secondary antibodies and Hoechst for 45 min at RT,  
412 washed in PBS three times 5 min and mounted in PBS Glycerol 75%.

413 For immunohistochemistry, TA muscles were fixed for 24 h in 4% PFA at 4°C, washed  
414 in cold PBS four times 1 h at 4°C, equilibrated in 20 % sucrose (Sigma) overnight at 4°C,  
415 embedded in Tissue Freezing Medium (Leica) and snap-frozen on liquid nitrogen. 12  $\mu\text{m}$   
416 cryosections were allowed to dry at RT for 30 min and rehydrated in PBS for 15 min. Antigen  
417 retrieval was performed in Tris 10 mM EDTA 1 mM pH 9 for 10 min at 95°C, followed by  
418 three short PBS washes and an additional wash in PBS for 30 min at RT. Sections were  
419 permeabilized in 0.5% Triton X-100 for 20 min at RT, washed three times in PBS, blocked in  
420 M.O.M. Mouse Ig Blocking Reagent (Vector Laboratories) for 1 h at RT, washed three times  
421 in PBS, incubated in M.O.M. Diluent (Vector Laboratories) for 5 min at RT, incubated with  
422 primary antibodies (Pax7 (Fig. 2d) or 5FD (Fig. 2g), GFP, in M.O.M. Diluent) for 1 h at RT,  
423 washed three times 5 min in PBS, incubated with M.O.M. Biotinylated Anti-Mouse IgG



424 Reagent (Vector Laboratories) for 10 min at RT, washed three times 5 min in PBS, incubated  
425 with secondary antibodies (Streptavidin-Alexa Fluor 405, Donkey anti-Chick Alexa Fluor  
426 594, in M.O.M. Diluent) for 30 min at RT, washed three times 5 min in PBS. For  
427 Pax7/Myod/Myog triple staining, sections were further blocked with anti-Pax7 antibody (in  
428 M.O.M. Diluent) for 1 h at RT, washed three times 5 min in PBS, incubated with Alexa Fluor  
429 488-conjugated anti-Myogenin and DyLight 550-conjugated anti-Myod antibodies (see  
430 below, in M.O.M. Diluent) overnight at 4°C, washed in PBS three times 5 min and mounted  
431 in PBS Glycerol 75%. EdU incorporation was detected with the Click-iT Plus Alexa Fluor  
432 488 Imaging Kit (ThermoFisher) as recommended.

433 Immunostainings were analysed with a Zeiss Observer.Z1 and a Zeiss LSM800 confocal  
434 microscopes. Images were processed with Imaris 7.2.1 software. For each cell pair, the  
435 daughter cells were named 'Cell A' and 'Cell B'. Fluorescence intensity was measured on  
436 segmented nuclei and expressed as a fraction of the maximum intensity between Cell A and  
437 Cell B. In case of absence of signal in both daughter cells (*eg.* symmetric absence of Pax7),  
438 the normalized fluorescence intensity was not determined (nd value).

439

#### 440 Antibody fluorescent labeling

441 Anti-myogenin antibody (5FD, DSHB) was purified with protein G sepharose (Sigma)  
442 as recommended. Briefly, hybridoma supernatant was incubated with protein G sepharose  
443 overnight at 4°C and packed into polypropylene columns (Qiagen), washed five times with  
444 PBS and antibody was eluted twice with 1.5 ml glycine 100 mM pH 2.7, neutralized with 150  
445  $\mu$ l Tris 1M pH 9. Elution fractions were pooled and dialyzed (ThermoFisher) against PBS  
446 overnight at 4°C. Antibody was concentrated with Amicon Ultra centrifugal filters (Merck) to  
447 1 mg/ml. 100  $\mu$ l of purified F5D antibody at 1 mg/ml (*resp.* anti-Myod at 0.75 mg/ml (BD  
448 Bioscience)) were dialysed (Thermofisher) against NaHCO<sub>3</sub> 100 mM pH 8.3 (*resp.* Na<sub>2</sub>B<sub>4</sub>O<sub>7</sub>  
449 50 mM pH 8.5) overnight at 4°C, incubated with 120  $\mu$ M Alexa Fluor 488 NHS ester  
450 (ThermoFisher)(*resp.* 60  $\mu$ M DyLight 405 NHS ester (ThermoFisher) or 70  $\mu$ M DyLight 550  
451 NHS ester (ThermoFisher)) at 23°C for 1 h. NaCl concentration was adjusted to 150 mM and  
452 excess fluorescent dye was removed with Pierce Dye Removal Columns (ThermoFisher)  
453 following manufacturer's recommendations. Desalted labeled antibodies were further  
454 dialysed (ThermoFisher, Cat#69570) against PBS overnight at 4°C and stored at -20°C with 1  
455 mg/ml bovine serum albumin (Sigma) and 50% glycerol.

456

457

458 **Data availability**

459 All data supporting the findings of this study are available from the corresponding author on  
460 reasonable request.

461

462 **References**

- 463 1. Xu, M. *et al.* Partitioning of histone H3-H4 tetramers during DNA replication-  
464 dependent chromatin assembly. *Science* **328**, 94–8 (2010).
- 465 2. Ahmad, K. & Henikoff, S. The histone variant H3.3 marks active chromatin by  
466 replication-independent nucleosome assembly. *Mol. Cell* **9**, 1191–200 (2002).
- 467 3. Tran, V., Lim, C., Xie, J. & Chen, X. Asymmetric division of *Drosophila* male  
468 germline stem cell shows asymmetric histone distribution. *Science* **338**, 679–682  
469 (2012).
- 470 4. Kimura, H. & Cook, P. R. Kinetics of core histones in living human cells: little  
471 exchange of H3 and H4 and some rapid exchange of H2B. *J. Cell Biol.* **153**, 1341–53  
472 (2001).
- 473 5. Dion, M. F. *et al.* Dynamics of Replication-Independent Histone Turnover in Budding  
474 Yeast. *Science (80-. )*. **315**, 1405–1408 (2007).
- 475 6. Verzijlbergen, K. F. *et al.* Recombination-induced tag exchange to track old and new  
476 proteins. *Proc. Natl. Acad. Sci. U. S. A.* **107**, 64–8 (2010).
- 477 7. Deal, R. B., Henikoff, J. G. & Henikoff, S. Genome-Wide Kinetics of Nucleosome  
478 Turnover Determined by Metabolic Labeling of Histones. *Science (80-. )*. **328**, 1161–  
479 1164 (2010).
- 480 8. Filipescu, D., Müller, S. & Almouzni, G. Histone H3 Variants and Their Chaperones  
481 During Development and Disease: Contributing to Epigenetic Control. *Annu. Rev. Cell*  
482 *Dev. Biol.* **30**, 615–646 (2014).
- 483 9. Yadav, T., Quivy, J.-P. & Almouzni, G. Chromatin plasticity: A versatile landscape  
484 that underlies cell fate and identity. *Science (80-. )*. **361**, 1332–1336 (2018).
- 485 10. Keppler, A. *et al.* A general method for the covalent labeling of fusion proteins with  
486 small molecules in vivo. *Nat. Biotechnol.* **21**, 86–89 (2003).
- 487 11. Hinner, M. J. & Johnsson, K. How to obtain labeled proteins and what to do with them.  
488 *Curr. Opin. Biotechnol.* **21**, 766–776 (2010).
- 489 12. Yang, G. *et al.* Genetic targeting of chemical indicators in vivo. *Nat. Methods* **12**, 137–  
490 139 (2014).
- 491 13. Kohl, J. *et al.* Ultrafast tissue staining with chemical tags. *Proc. Natl. Acad. Sci. U. S.*

- 492 A. **111**, E3805-14 (2014).
- 493 14. Keppler, A. *et al.* Labeling of fusion proteins of O6-alkylguanine-DNA  
494 alkyltransferase with small molecules in vivo and in vitro. *Methods* **32**, 437–444  
495 (2004).
- 496 15. Bodor, D. L., Valente, L. P., Mata, J. F., Black, B. E. & Jansen, L. E. T. Assembly in  
497 G1 phase and long-term stability are unique intrinsic features of CENP-A  
498 nucleosomes. *Mol. Biol. Cell* **24**, 923–32 (2013).
- 499 16. Ray-Gallet, D. *et al.* Dynamics of histone H3 deposition in vivo reveal a nucleosome  
500 gap-filling mechanism for H3.3 to maintain chromatin integrity. *Mol. Cell* **44**, 928–941  
501 (2011).
- 502 17. Adam, S., Polo, S. E. & Almouzni, G. Transcription recovery after DNA damage  
503 requires chromatin priming by the H3.3 histone chaperone HIRA. *Cell* **155**, 94–106  
504 (2013).
- 505 18. Clément, C. *et al.* High-resolution visualization of H3 variants during replication  
506 reveals their controlled recycling. *Nat. Commun.* **9**, 3181 (2018).
- 507 19. Deaton, A. M. *et al.* Enhancer regions show high histone H3.3 turnover that changes  
508 during differentiation. *Elife* **5**, (2016).
- 509 20. Morrison, S. J. & Kimble, J. Asymmetric and symmetric stem-cell divisions in  
510 development and cancer. *Nature* **441**, 1068–1074 (2006).
- 511 21. Knoblich, J. A. Mechanisms of asymmetric stem cell division. *Cell* **132**, 583–597  
512 (2008).
- 513 22. Tajbakhsh, S. & Gonzalez, C. Biased segregation of DNA and centrosomes: moving  
514 together or drifting apart? *Nat. Rev. Mol. Cell Biol.* **10**, 804–810 (2009).
- 515 23. Nakano, S., Stillman, B. & Horvitz, H. R. Replication-coupled chromatin assembly  
516 generates a neuronal bilateral asymmetry in *C. elegans*. *Cell* **147**, 1525–36 (2011).
- 517 24. Xie, J. *et al.* Histone H3 threonine phosphorylation regulates asymmetric histone  
518 inheritance in the *Drosophila* male germline. *Cell* **163**, 1–14 (2015).
- 519 25. Reznik, M. Thymidine-3H uptake by satellite cells of regenerating skeletal muscle. *J.*  
520 *Cell Biol.* **40**, 568–571 (1969).
- 521 26. Gayraud-Morel, B., Chrétien, F. & Tajbakhsh, S. Skeletal muscle as a paradigm for  
522 regenerative biology and medicine. *Regen. Med.* **4**, 293–319 (2009).
- 523 27. Kuang, S., Kuroda, K., Le Grand, F. & Rudnicki, M. A. Asymmetric self-renewal and  
524 commitment of satellite stem cells in muscle. *Cell* **129**, 999–1010 (2007).
- 525 28. Rocheteau, P., Gayraud-Morel, B., Siegl-Cachedenier, I., Blasco, M. A. & Tajbakhsh,

- 526 S. A subpopulation of adult skeletal muscle stem cells retains all template DNA strands  
527 after cell division. *Cell* **148**, 112–125 (2012).
- 528 29. Yennek, S., Burute, M., Théry, M. & Tajbakhsh, S. Cell adhesion geometry regulates  
529 non-random DNA segregation and asymmetric cell fates in mouse skeletal muscle stem  
530 cells. *Cell Rep.* **7**, 961–970 (2014).
- 531 30. Lukjanenko, L. *et al.* Loss of fibronectin from the aged stem cell niche affects the  
532 regenerative capacity of skeletal muscle in mice. *Nat. Med.* **22**, 897–905 (2016).
- 533 31. Dumont, N. A. *et al.* Dystrophin expression in muscle stem cells regulates their  
534 polarity and asymmetric division. *Nat. Med.* **21**, 1455–1463 (2015).
- 535 32. Sambasivan, R. *et al.* Distinct regulatory cascades govern extraocular and pharyngeal  
536 arch muscle progenitor cell fates. *Dev. Cell* **16**, 810–821 (2009).
- 537 33. Théry, M. *et al.* The extracellular matrix guides the orientation of the cell division axis.  
538 *Nat. Cell Biol.* **7**, 947–953 (2005).
- 539 34. Freida, D. *et al.* Human bone marrow mesenchymal stem cells regulate biased DNA  
540 segregation in response to cell adhesion asymmetry. *Cell Rep.* **5**, 601–610 (2013).
- 541 35. Dumont, N. A., Wang, Y. X. & Rudnicki, M. A. Intrinsic and extrinsic mechanisms  
542 regulating satellite cell function. *Development* **142**, 1572–1581 (2015).
- 543 36. Voog, J. & Jones, D. L. Stem cells and the niche: a dynamic duo. *Cell Stem Cell* **6**,  
544 103–115 (2010).
- 545 37. Bentzinger, C. F., Wang, Y. X., Dumont, N. A. & Rudnicki, M. A. Cellular dynamics  
546 in the muscle satellite cell niche. *EMBO Rep.* **14**, 1062–1072 (2013).
- 547 38. Kim, Y. H. *et al.* Cell cycle–dependent differentiation dynamics balances growth and  
548 endocrine differentiation in the pancreas. *PLoS Biol.* **13**, 1–25 (2015).
- 549 39. Yu, C. *et al.* A mechanism for preventing asymmetric histone segregation onto  
550 replicating DNA strands. *Science (80-. )*. **361**, 1386–1389 (2018).
- 551 40. Petryk, N. *et al.* MCM2 promotes symmetric inheritance of modified histones during  
552 DNA replication. *Science (80-. )*. **361**, 1389–1392 (2018).
- 553 41. Wooten, M. *et al.* Asymmetric Histone Incorporation During DNA Replication in  
554 *Drosophila* Male Germline Stem Cells. *bioRxiv* doi: <https://doi.org/10.1101/242768>  
555 (2018). doi:10.2139/ssrn.3155700
- 556 42. Lansdorp, P. M. Immortal strands? Give me a break. *Cell* **129**, 1244–1247 (2007).
- 557 43. García del Arco, A., Edgar, B. A. & Erhardt, S. In vivo analysis of centromeric  
558 proteins reveals a stem cell-specific asymmetry and an essential role in differentiated,  
559 non-proliferating cells. *Cell Rep.* **22**, 2094–2106 (2018).

- 560 44. Siwek, W., Gómez-Rodríguez, M., Sobral, D., Jr, I. R. C. & Jansen, L. E. T. time-  
561 ChIP: A Method to Determine Long-Term Locus- Specific Nucleosome Inheritance.  
562 *Methods Mol. Biol.* **1832**, (2018).
- 563 45. Mathew, S. J. *et al.* Connective tissue fibroblasts and Tcf4 regulate myogenesis.  
564 *Development* **138**, 371–384 (2011).
- 565 46. Muzumdar, M. D., Tasic, B., Miyamichi, K., Li, L. & Luo, L. A global double-  
566 fluorescent Cre reporter mouse. *Genesis* **45**, 593–605 (2007).
- 567 47. Livak, K. J. & Schmittgen, T. D. Analysis of relative gene expression data using real-  
568 time quantitative PCR and the  $2^{-\Delta\Delta CT}$  method. *Methods* **25**, 402–408 (2001).
- 569 48. Rumbaugh, G. & Miller, C. A. Epigenetic changes in the brain: measuring global  
570 histone modifications. *Methods Mol. Biol.* **670**, 263–274 (2010).
- 571 49. Gayraud-Morel, B. *et al.* A role for the myogenic determination gene Myf5 in adult  
572 regenerative myogenesis. *Dev. Biol.* **312**, 13–28 (2007).
- 573 50. Tinevez, J.-Y. *et al.* TrackMate: An open and extensible platform for single-particle  
574 tracking. *Methods* **115**, 80–90 (2017).
- 575 51. Vignaud, T., Ennomani, H. & Théry, M. Polyacrylamide hydrogel micropatterning.  
576 *Methods Cell Biol.* **120**, 93–116 (2014).
- 577 52. Urciuolo, A. *et al.* Collagen VI regulates satellite cell self-renewal and muscle  
578 regeneration. *Nat. Commun.* **4**, 1–26 (2013).

579

## 580 **Acknowledgments**

581 This work was supported by Institut Pasteur and grants from Agence Nationale de la  
582 Recherche (Laboratoire d'Excellence Revive, Investissement d'Avenir; ANR-10-LABX-73,  
583 ANR-16-CE12-0024) and Association Française contre les Myopathies, CNRS, and the  
584 European Research Council (Advanced Research Grant 332893). We would like to thank the  
585 Mouse Genetics Engineering Platform (Institut Pasteur), the Flow Cytometry and Photonic  
586 Bioimaging Platforms of the Center for Technological Resources and Research (Institut  
587 Pasteur), Johan van der Vlag (Radboud University, Netherlands) for providing the H3.1  
588 antibody, Glenda Comai (Institut Pasteur) for initial assistance with confocal imaging, Dan  
589 Filipescu for his advice to establish the mouse H3-SNAP variants, and Tom Cheung (Hong  
590 Kong University of Science & Technology) for advice on antibody labeling. G.A. received  
591 support from ANR.

592

593

594 **Author contributions**

595 B.E. and S.T. proposed the concept, designed the experiments, and wrote the paper. B.E.  
596 performed and analysed the experiments. G.L.C. provided technical support. G.A. contributed  
597 to application for the project, advised on experiments and edited the paper. All authors read  
598 and agreed on the manuscript.

599

600 **Competing interests**

601 The authors declare no competing interests.

602

603 **Materials and correspondence**

604 Correspondence and material requests should be addressed to  
605 [shahragim.tajbakhsh@pasteur.fr](mailto:shahragim.tajbakhsh@pasteur.fr)

607

**Fig. 1**

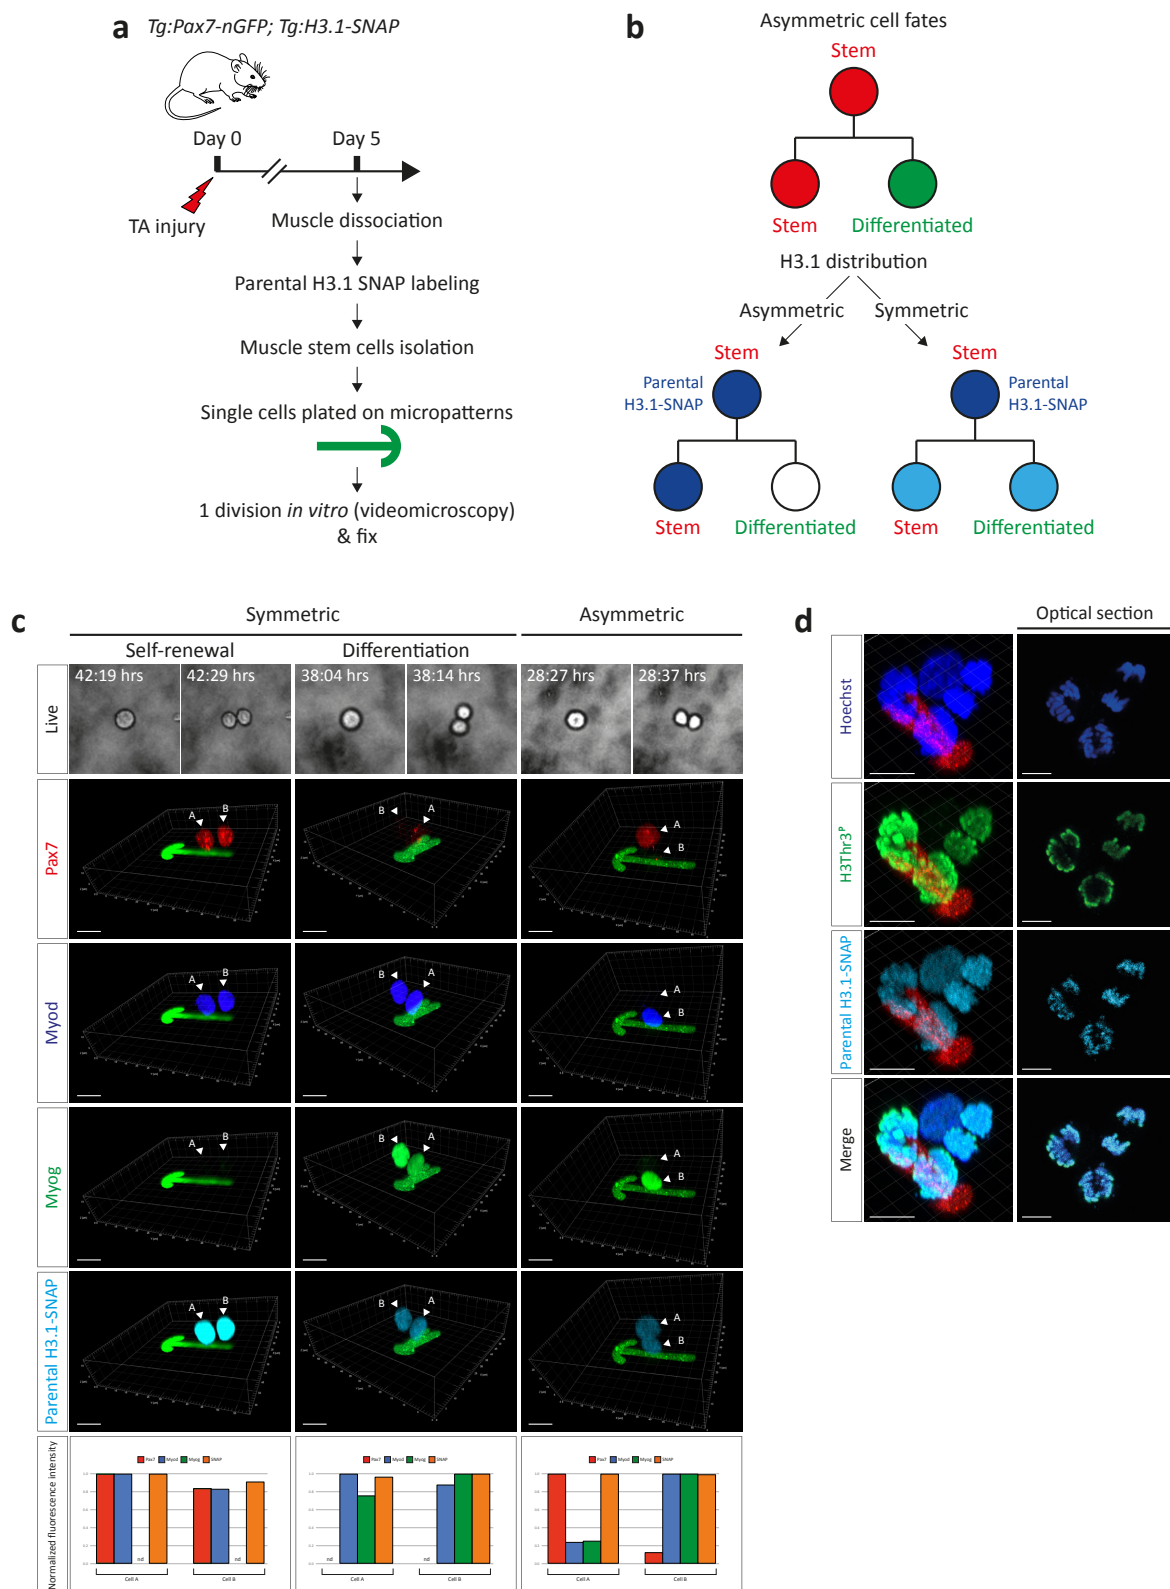

609 **Fig. 1 Parental H3.1 histones are symmetrically distributed during asymmetric cell fate**  
610 **decisions *ex vivo*.** **a**, Experimental scheme. **b**, Potential parental histone distribution patterns.  
611 **c**, Representative examples of parental H3.1 inheritance pattern during SCD, towards self-  
612 renewal (left) or differentiation (middle), or ACD (right). Arrowheads indicate nuclei of  
613 daughter cells. For each cell pair, the daughter cells were named ‘Cell A’ and ‘Cell B’.  
614 Fluorescence intensity was measured on segmented nuclei and expressed as a fraction of the  
615 maximum intensity between Cell A and Cell B. In case of absence of signal in both daughter  
616 cells (*eg.* symmetric absence of Pax7), the normalized fluorescence intensity was not  
617 determined (nd value). n=4 mice, n=100 cell divisions/mouse. **d**, H3T3<sup>P</sup> signal colocalizes  
618 with H3.1-SNAP signal. n=3 mice. n=10 cell divisions/mouse. Scale bar 10  $\mu$ m.



## Fig. 2

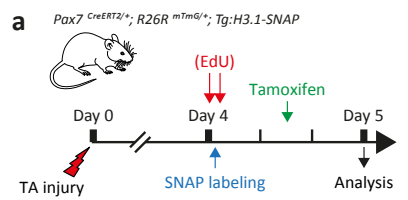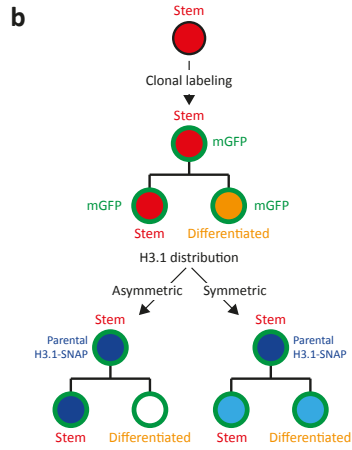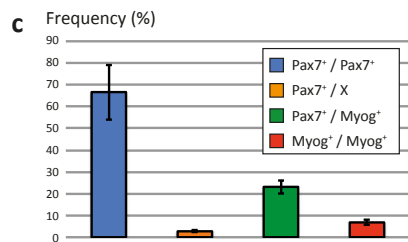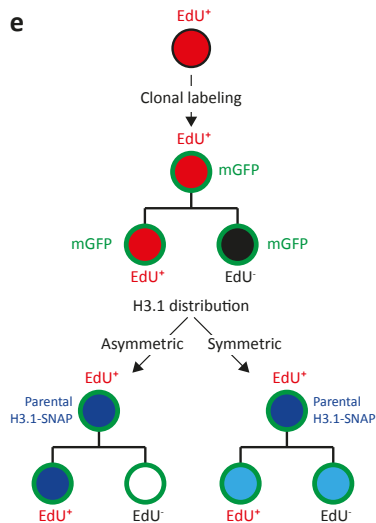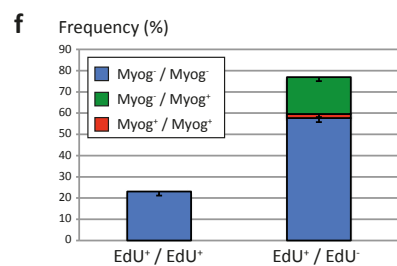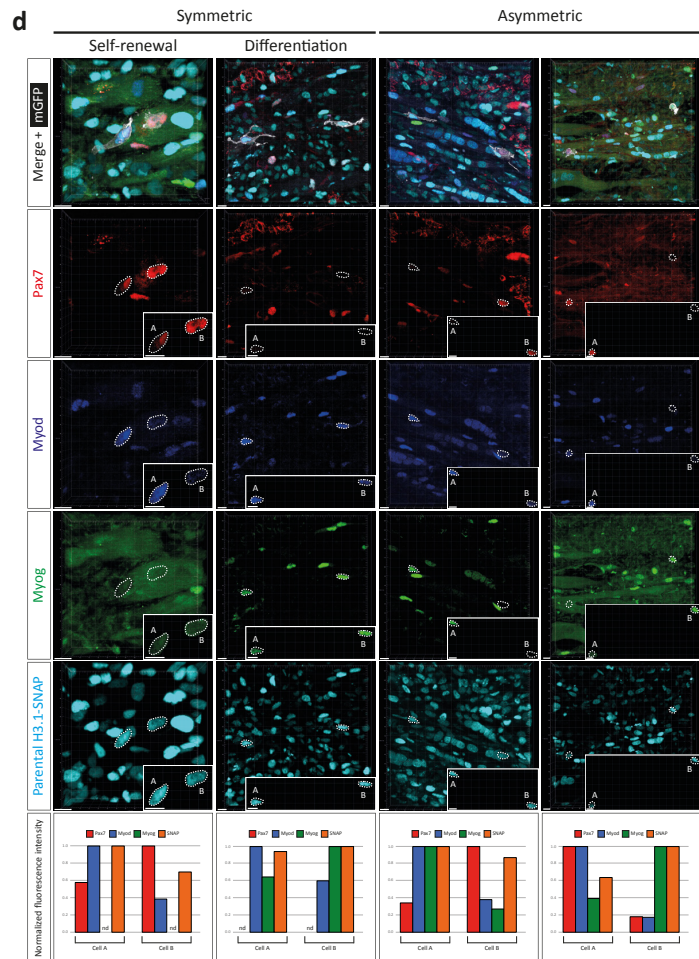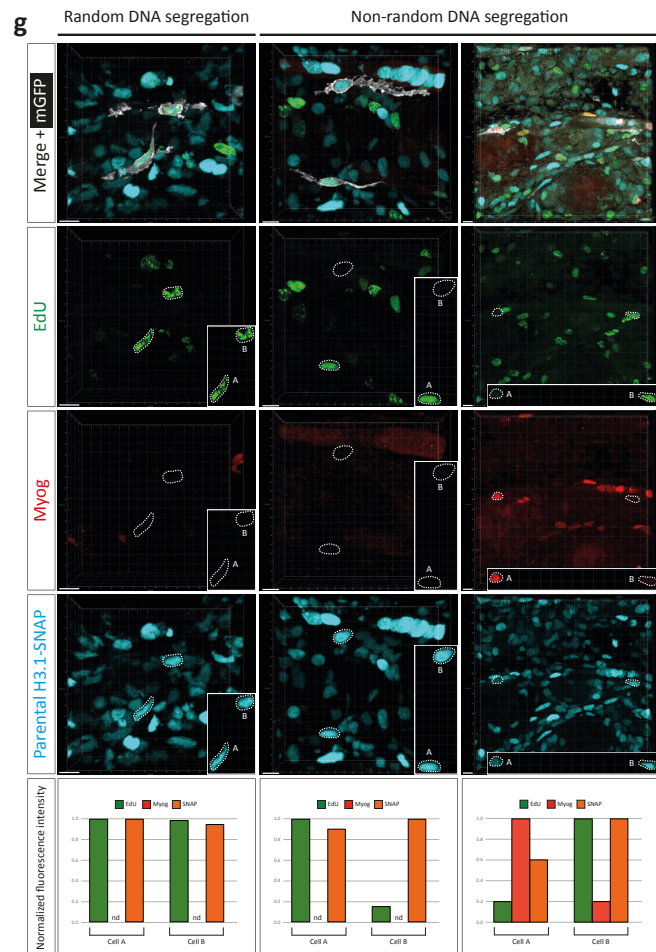

621

622 **Fig. 2 Parental H3.1 histones are symmetrically distributed during asymmetric cell fate**  
623 **decisions and non-random DNA segregation *in vivo*.** **a**, Experimental scheme. Lineage-  
624 tracing was tamoxifen-induced 14 h before analysis; parental histones were labeled 8 h before  
625 tamoxifen administration; old DNA strands were labeled with EdU (Fig. 2e, 2f and 2g) 9 and  
626 7 h before tamoxifen administration. **b**, Potential parental histone distribution patterns during  
627 asymmetric cell fate decisions. **c**, Frequencies of the different modes of cell division. Rare  
628 examples of Pax7/X and Myog/X daughter cells were observed, where one daughter cell  
629 expresses Pax7 or Myog and the other neither Pax7 nor Myog. n=3 mice, n=147 divisions.  
630 Data are presented as mean  $\pm$  SEM. **d**, Representative examples of parental H3.1 inheritance  
631 pattern during SCD, towards self-renewal (left) or differentiation (middle-left), or ACD  
632 (middle-right and right). The mGFP signal from labeled daughter cells is shown only in the  
633 merged image for clarity; nuclei of daughter cells are outlined. Insets show nuclei of daughter  
634 cells isolated from other cells. For each cell pair, the daughter cells were named 'Cell A' and  
635 'Cell B'. Fluorescence intensity was measured on segmented nuclei and expressed as a  
636 fraction of the maximum intensity between Cell A and Cell B. In case of absence of signal in  
637 both daughter cells (*eg.* symmetric absence of Pax7), the normalized fluorescence intensity  
638 was not determined (nd value). See Supplementary Fig. 2a for corresponding low  
639 magnification images showing the clonality of the analysed events. Scale bar 10  $\mu$ m. **e**,  
640 Potential parental histone distribution patterns during non-random DNA segregation. **f**,  
641 Frequencies of the different modes of DNA segregation (random EdU<sup>+</sup>/EdU<sup>+</sup> and non-random  
642 EdU<sup>+</sup>/EdU<sup>-</sup>) and fate decisions assessed by Myogenin expression. n=2 mice, n=52 divisions.  
643 Data are presented as mean  $\pm$  SEM. **g**, Representative examples of parental H3.1 inheritance  
644 pattern during random DNA segregation (left) or non-random DNA segregation (middle and  
645 right), with symmetric absence of Myogenin expression (left and middle) or asymmetric

646 Myogenin expression (right). The mGFP signal from labeled daughter cells is shown only in  
647 the merged image for clarity; nuclei of daughter cells are outlined. Insets show nuclei of  
648 daughter cells isolated from other cells. For each cell pair, the daughter cells were named  
649 ‘Cell A’ and ‘Cell B’. Fluorescence intensity was measured on segmented nuclei and  
650 expressed as a fraction of the maximum intensity between Cell A and Cell B. In case of  
651 absence of signal in both daughter cells (*eg.* symmetric absence of Myog), the normalized  
652 fluorescence intensity was not determined (nd value). See Supplementary Fig. 2c for  
653 corresponding low magnification images showing the clonality of the analysed events. Scale  
654 bar 10  $\mu\text{m}$ .

655

#### 656 **Statistical information**

657 Bar charts represent the mean  $\pm$  standard error of the mean (SEM) or standard deviation of the  
658 mean (SD) as specified.

659

#### 660 **Supplementary information**

661

#### 662 **Supplementary figures**

664

665

## Supplementary Fig. 1

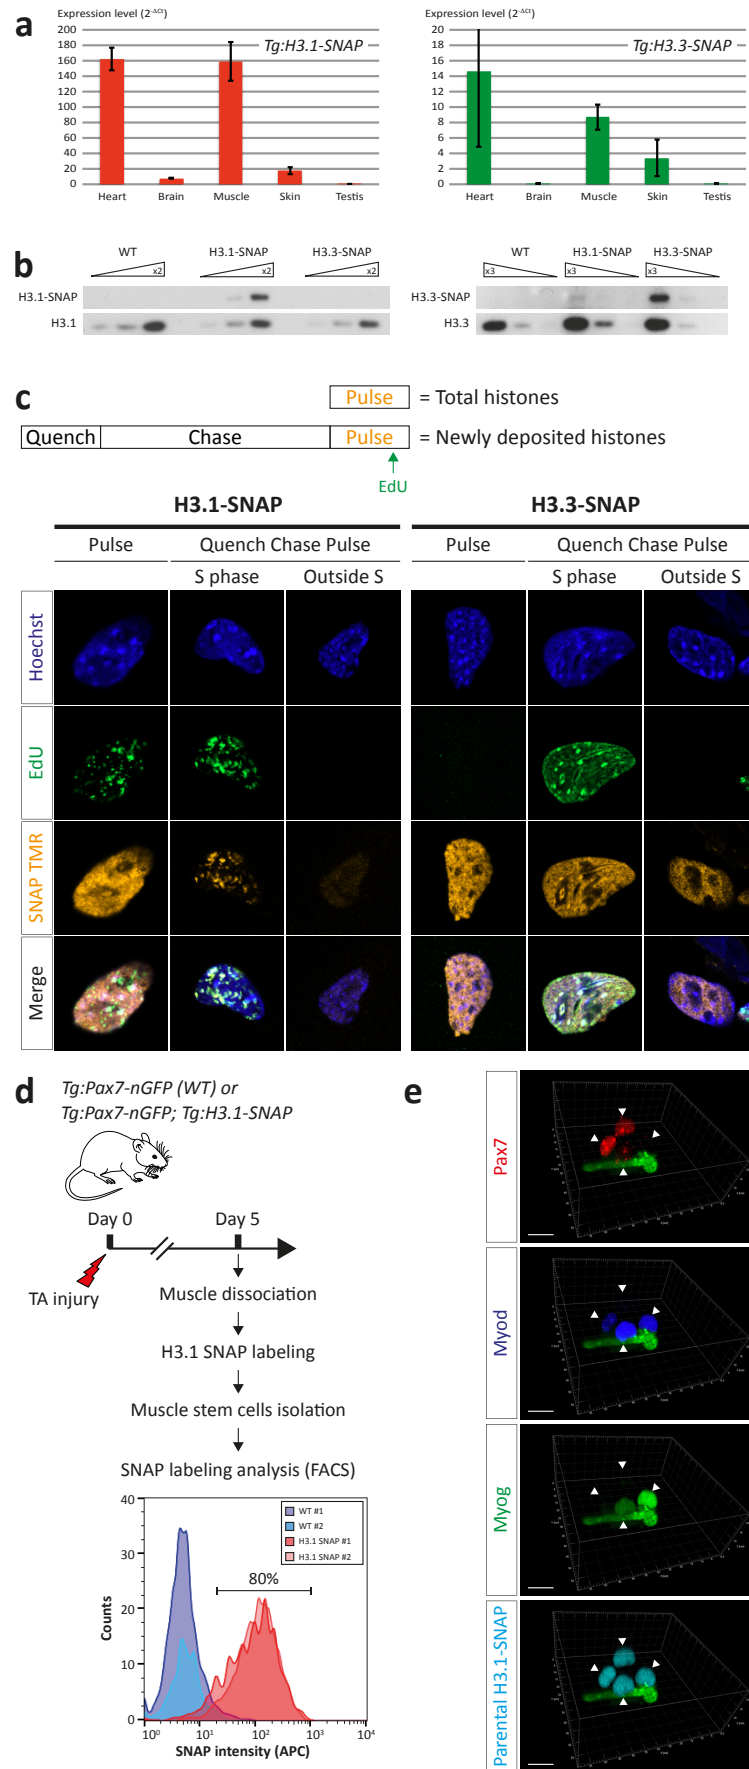

668 **Supplementary Fig. 1 *Tg:H3.1-SNAP* and *Tg:H3.3-SNAP* reporter lines validation and**  
669 ***ex vivo* SNAP labeling of satellite cells. a,** Transgene expression level (RT-qPCR) from  
670 heart, brain, skeletal muscle, skin and testis; n=2 mice per genotype. Data are presented as  
671 mean  $\pm$  SD. **b,** Transgene expression level (Western blot) from primary embryonic fibroblasts  
672 derived from WT, *Tg:H3.1-SNAP* and *Tg:H3.3-SNAP* mice, detected with anti-H3.1 (left) or  
673 anti-H3.3 (right) antibodies. Each panel shows the endogenous (bottom) and SNAP-tagged  
674 (top) histone variant. Triangles indicate different amounts of material loaded, centered on 1  
675  $\mu$ g. **c,** SNAP TMR labeling of total (Pulse) or newly deposited (Quench Chase Pulse) SNAP-  
676 tagged histone variants and DNA replication sites (EdU) in *Tg:H3.1-SNAP* and *Tg:H3.3-*  
677 *SNAP* primary fibroblasts as in<sup>16</sup>. **d,** Efficiency of *ex vivo* SNAP labeling of satellite cells.  
678 80% of *Tg:H3.1-SNAP* satellite cells were labeled compared to WT control cells; n=2 mice  
679 per genotype. **e,** Example of a four-cell clone with two Pax7+ cells and two Myog+ cells on a  
680 micropattern. Myog+ differentiated cells have left the cell cycle, therefore the 4-cell clone can  
681 result from an ACD where the Pax7+ daughter undergoes a SCD, then ACD; another  
682 possibility is an initial SCD, then each daughter undergoes an ACD. No cell death was  
683 observed. Scale bar 10  $\mu$ m.

685

686

## Supplementary Fig. 2

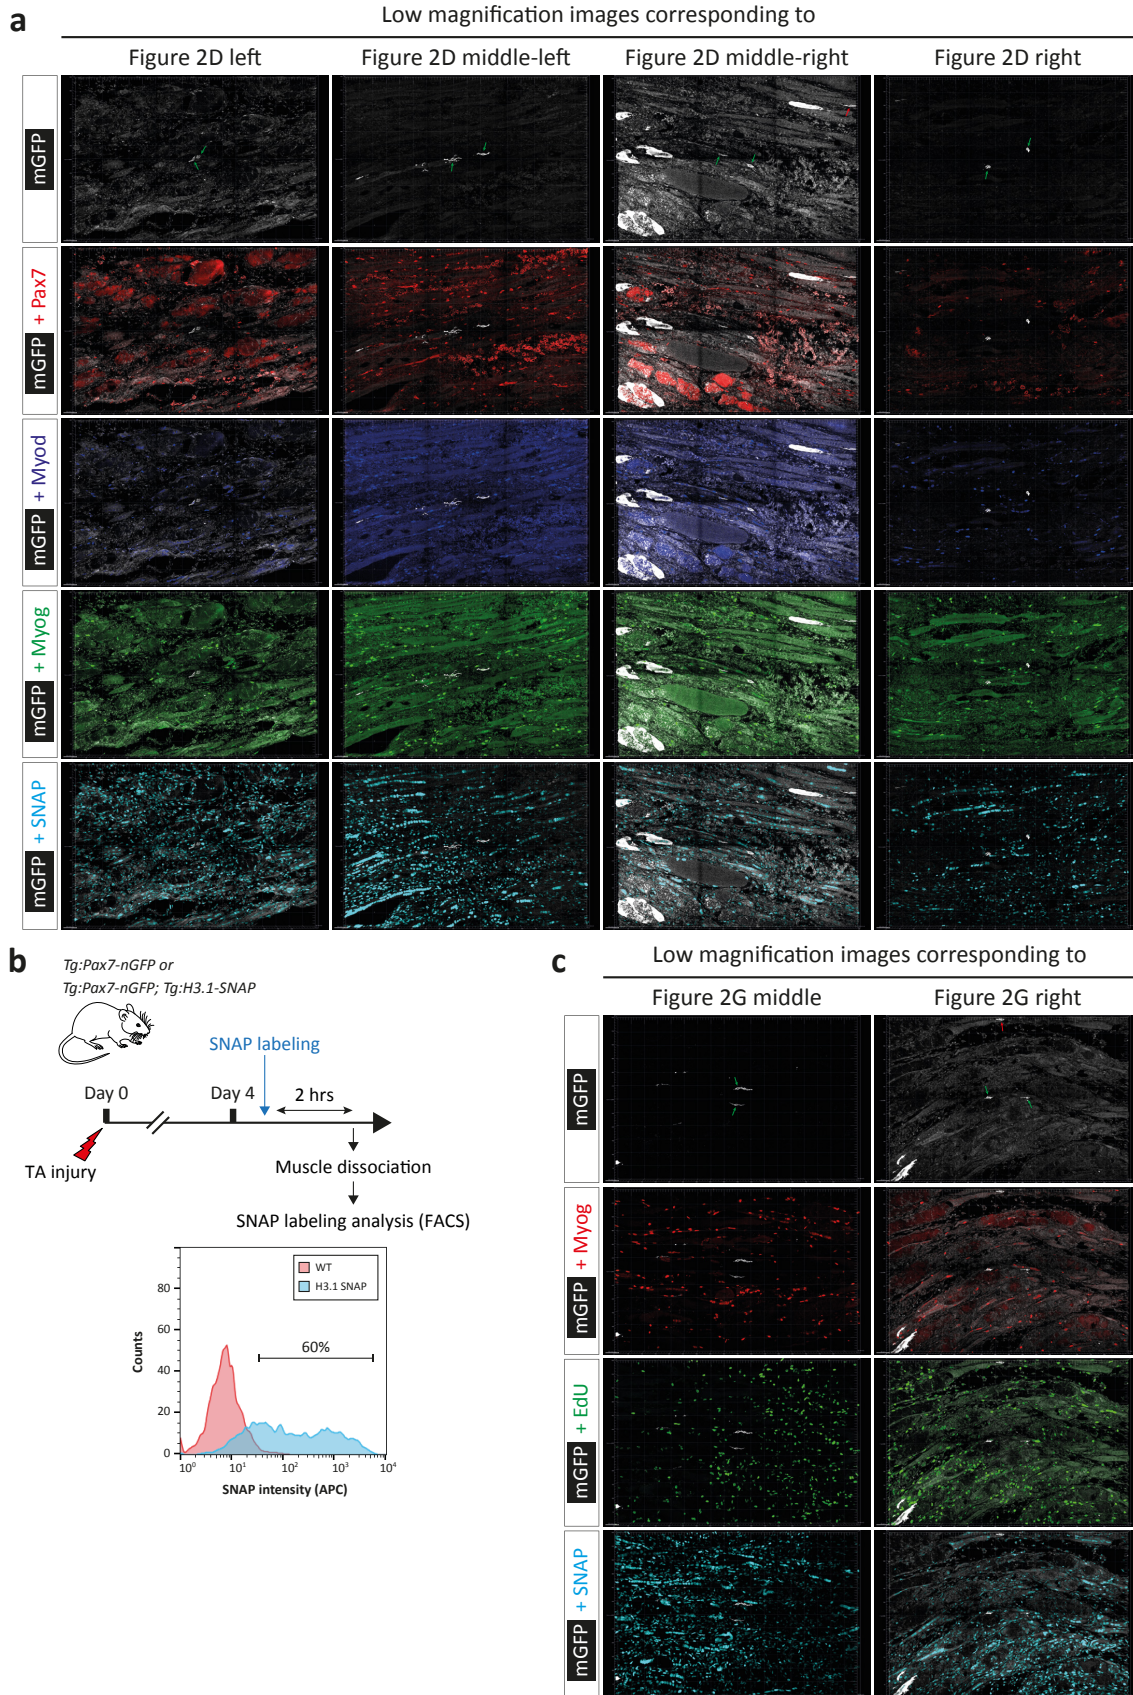

689 **Supplementary Fig. 2 *In vivo* SNAP labeling of satellite cells and clonality of the**  
690 **analysed *in vivo* cell divisions. a**, Low magnification images (600  $\mu\text{m}$  x 900  $\mu\text{m}$ )  
691 corresponding to high magnification images of Fig. 2d. Green arrows indicate mGFP-labeled  
692 daughter cells; red arrows indicate presumably unrelated mGFP-labeled cells. Scale bar 50  
693  $\mu\text{m}$ . **b**, Efficiency of *in vivo* SNAP labeling of satellite cells at 4 dpi. 60% of *Tg:H3.1-SNAP*  
694 satellite cells were labeled compared to WT control cells; n=2 mice per genotype. **c**, Low  
695 magnification images (600  $\mu\text{m}$  x 900  $\mu\text{m}$ ) corresponding to high magnification images of Fig.  
696 2g. Green arrows indicate mGFP-labeled daughter cells; red arrows indicate presumably  
697 unrelated mGFP-labeled cells. Scale bar 50  $\mu\text{m}$ .

### Supplementary Fig. 3

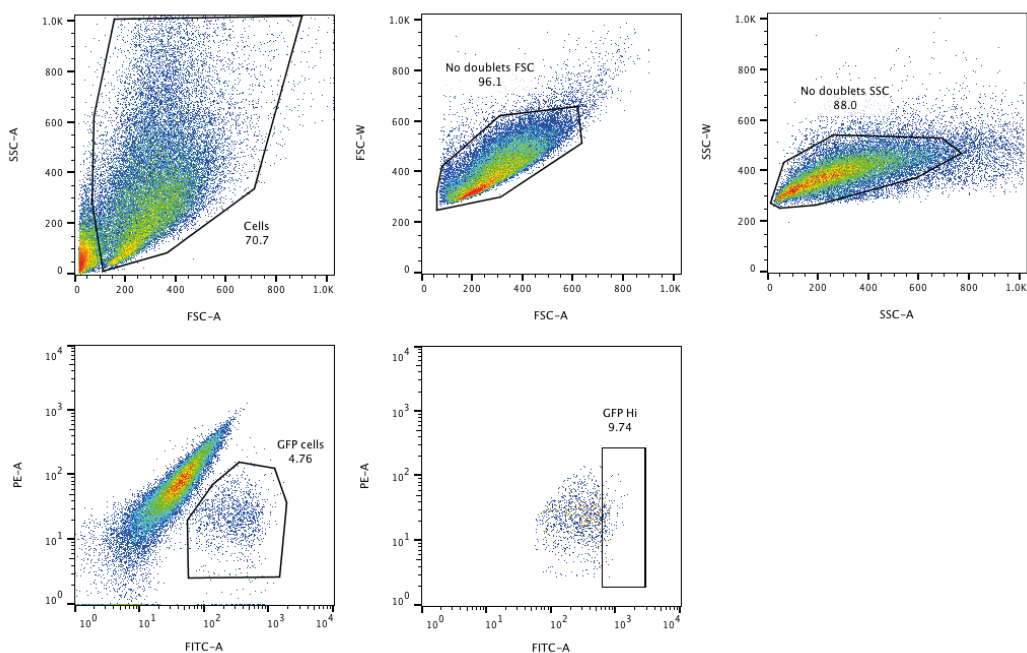

698

### 699 **Supplementary Fig. 3 Isolation of satellite cells by FACS.**

700 Satellite cells were isolated by FACS by gating first on size and granularity ('Cells' gate),  
701 excluding doublets ('No doublets FSC' then 'No doublets SSC' gates) and gating on the  
702 GFP+ population ('GFP cells' gate). Pax7-nGFP<sup>Hi</sup> cells (top 10% highest nGFP-expressing  
703 cells, 'GFP Hi' gate) were sorted.



704 **Supplementary Table 1. Oligonucleotides used in this study**

| Oligonucleotide | Sequence                                      |
|-----------------|-----------------------------------------------|
| NotI_mH3.1_F    | atgcgagcggccgcCGCCACCatggctcgtactaagcagaccgct |
| NotI_mH3.3_F    | atgcgagcggccgcCGCCACCatggctcgtacaaagcagactgcc |
| DPPVAT_mH3.1_R  | GGTGGCGACCGGTGGATCagcccgtcggcgggatacggcg      |
| DPPVAT_mH3.3_R  | GGTGGCGACCGGTGGATCagcacgttctccgctatgcggcg     |
| DPPVAT_SNAP_F   | GATCCACCGGTCGCCACCatggacaaagactgcgaa          |
| BamHI_SNAP_R    | Tttgatcctggcgcgcctatacctgc                    |
| CAG_For         | GCAACGTGCTGGTTATTGTG                          |
| SV40 PolyA_F    | CAATGTATCTTATCATGTCTGGATCGGG                  |
| SNAP qPCR_R     | TCAGAATGGGCACGGGATTT                          |
| SNAP qPCR_F     | CCAGCAGGAGAGCTTTACCC                          |
| CAG_R3          | CATATATGGGCTATGAACTAATGACCCC                  |
| Tbp_F           | ATCCCAAGCGATTTGCTG                            |
| Tbp_R           | CCTGTGCACACCATTTTCC                           |

705

706

707 **Supplementary movies**

708

709 **Supplementary Movie 1.**

710 Videomicroscopy of a Pax7-nGFP<sup>Hi</sup> cell isolated from TA muscle at 5 dpi and plated on an  
 711 asymmetric micropattern (not visible), corresponding to Fig. 1c left. The movie was started  
 712 3 h after plating and continued for 40 h; images were taken every 9 min (bright-field, 10×  
 713 magnification).

714

715 **Supplementary Movie 2.**

716 Videomicroscopy of a Pax7-nGFP<sup>Hi</sup> cell isolated from TA muscle at 5 dpi and plated on an  
 717 asymmetric micropattern (not visible), corresponding to Fig. 1c middle. The movie was  
 718 started 3 h after plating and continued for 40 h; images were taken every 9 min (bright-field,  
 719 10× magnification).

720

721 **Supplementary Movie 3.**

722 Videomicroscopy of a Pax7-nGFP<sup>Hi</sup> cell isolated from TA muscle at 5 dpi and plated on an  
723 asymmetric micropattern (not visible), corresponding to Fig. 1c right. The movie was started  
724 3 h after plating and continued for 40 h; images were taken every 9 min (bright-field, 10×  
725 magnification).
